# Supplementary material for: HepT1-derived murine models of high-risk hepatoblastoma display vascular invasion, metastasis, and circulating tumor cells
Source: Oxford University Press journal article supplement (doi:10.1242/bio.058973), 2022-04-22
Supplement: bio058973supp.pdf [file bio058973supp.pdf]

A

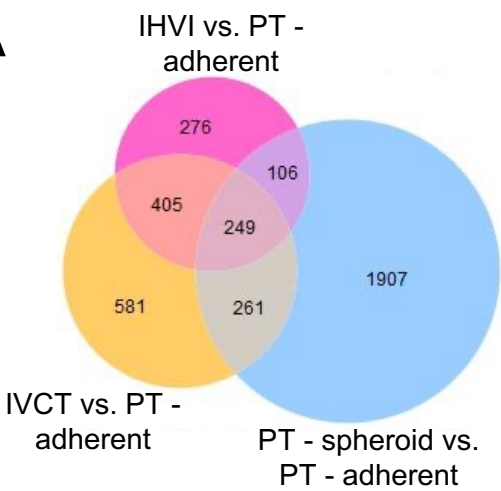

C

| Pathways upregulated in common in vascular invasion cell line samples |
|-----------------------------------------------------------------------|
| IL-17 signaling pathway                                               |
| PI3K-Akt signaling pathway                                            |
| Rheumatoid arthritis                                                  |
| Salmonella infection                                                  |
| Amoebiasis                                                            |
| Cytokine-cytokine receptor interaction                                |
| Legionellosis                                                         |
| Chemokine signaling pathway                                           |
| Kaposi-sarcoma associated herpesvirus infection                       |
| NOD-like receptor signaling pathway                                   |
| TNF signaling pathway                                                 |
| Pathways in cancer                                                    |
| Hippo signaling pathway                                               |

B

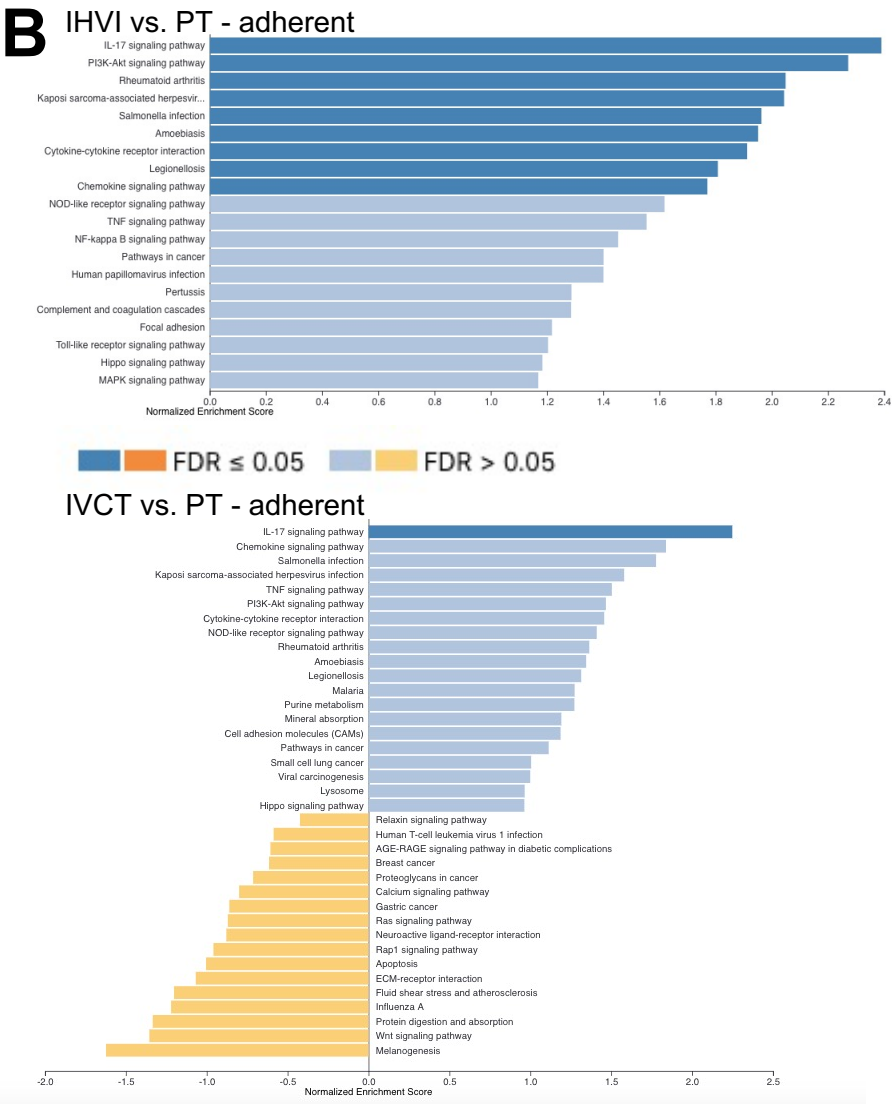

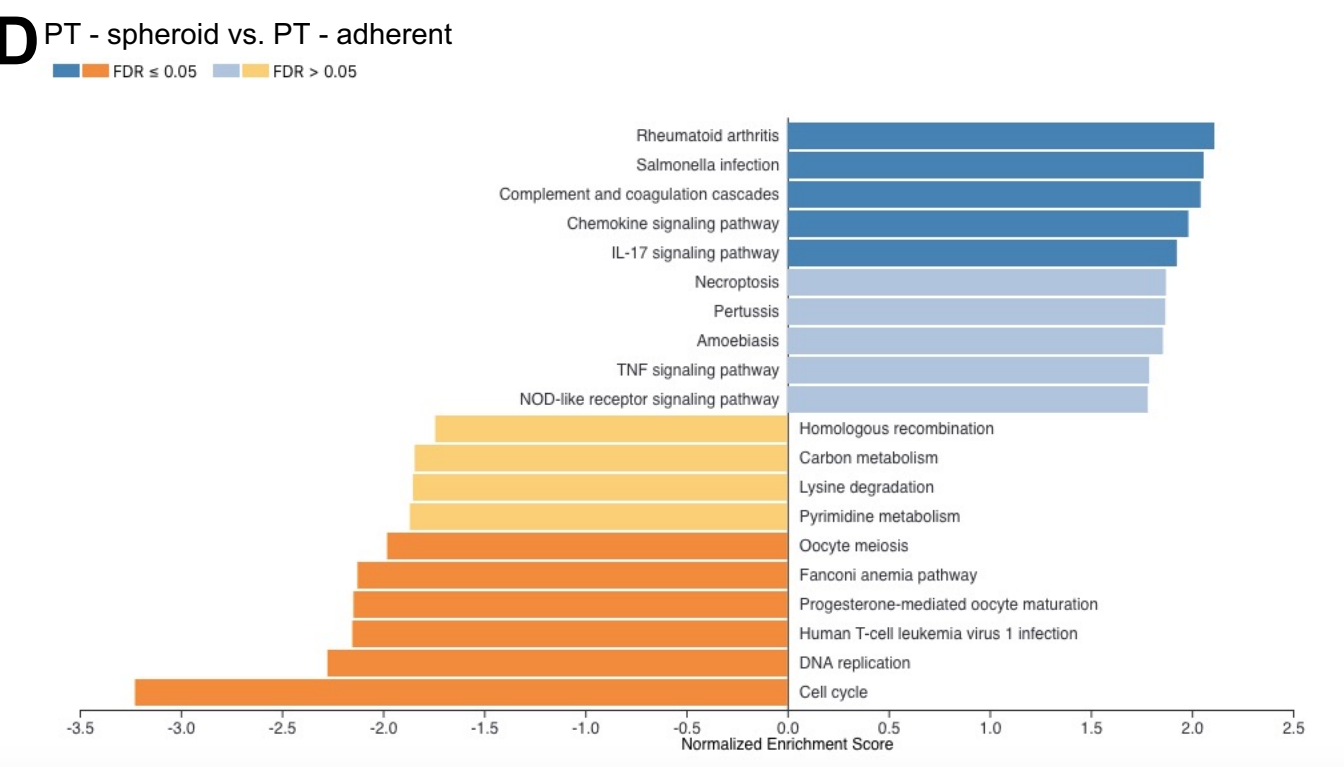

**Fig. S1. GSEA analysis of transcriptomic profiling of cell line samples.** (A) Venn diagram of significantly changed genes with a p-value of < 0.05 and log2 fold change > 1.5 or < -1.5 among the cell line samples. (B) Bar graphs of KEGG pathways significantly upregulated and downregulated between the primary tumor cell line (adherent) and IHVI cell line samples (top) and between the primary tumor cell line (adherent) and IVCT cell line samples (bottom). (C) List of KEGG pathways upregulated in common among the vascular invasion cell line samples. (D) Bar graph of KEGG pathways significantly upregulated and downregulated in between the primary tumor cell lines grown in adherent and spheroid conditions.

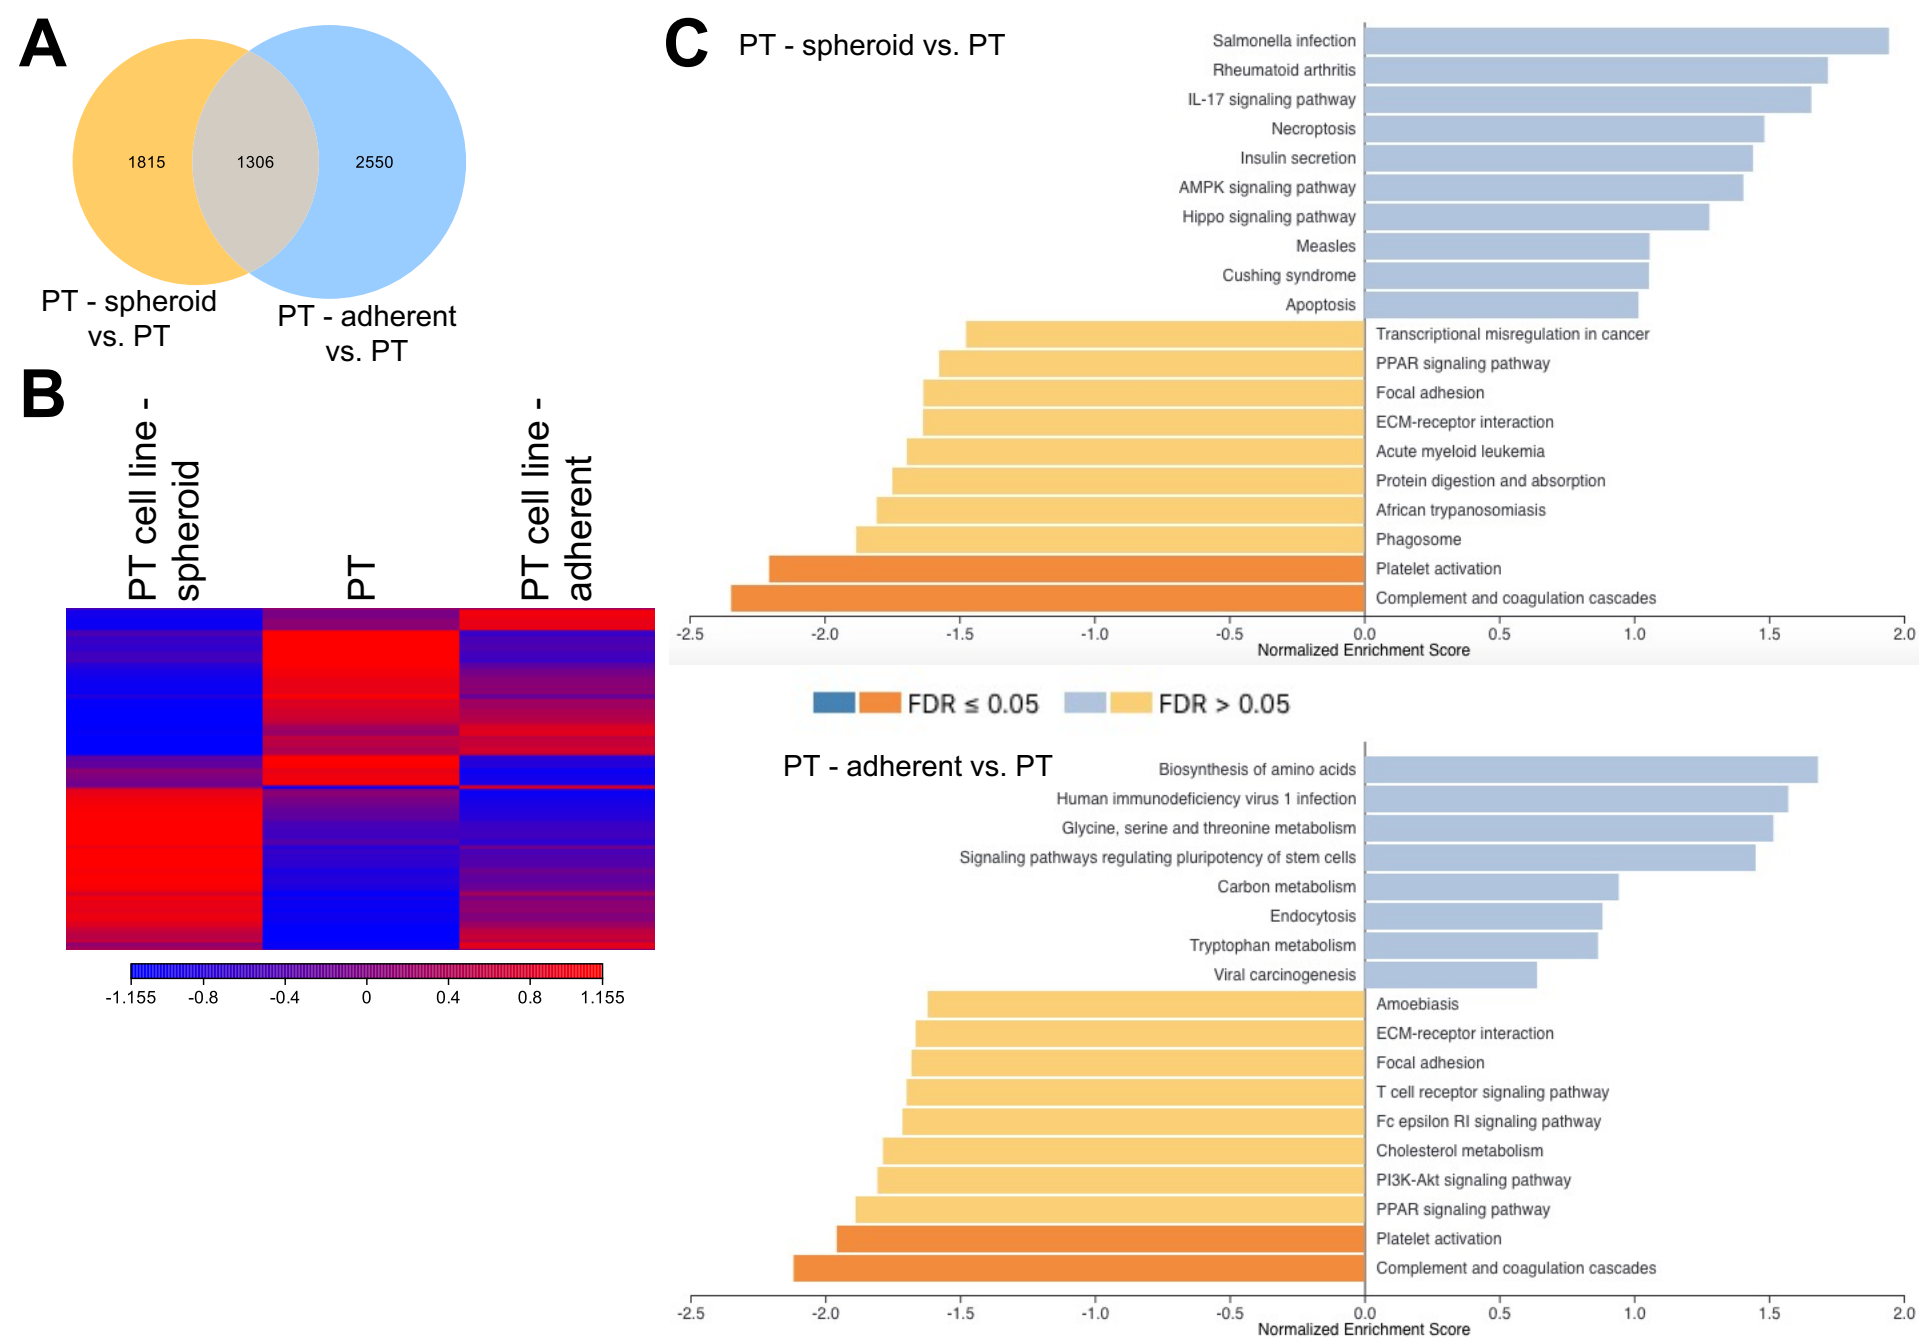

**Fig. S2. GSEA analysis of transcriptomic profiling of primary tumor cell line samples.** (A) Venn diagram of significantly changed genes with a p-value of < 0.05 and log2 fold change > 1.5 or < -1.5 among the primary tumor tissue sample and primary tumor cell line (adherent, spheroid) samples. (B) Hierarchical clustering heat map of differentially expressed genes with p-value < 0.05 from primary tumor tissue and tumor cell line samples. (C) Bar graphs of KEGG pathways significantly upregulated and downregulated between the primary tumor tissue and primary tumor cell line (spheroid) samples (top) and between the primary tumor tissue and primary tumor cell line (adherent) samples (bottom).

Table S1. Genetic alterations identified in the HepT1 parental cell line.

| Gene             | Pos(hg19)      | RefSeq RNA  | CDS                | Protein            |
|------------------|----------------|-------------|--------------------|--------------------|
| <i>CTNNB1</i>    | chr3:41265705  | NM_001904.3 | c.13+133_242-87del | p.Ala5_Ala80del    |
| <i>EP300</i>     | chr22:41525910 | NM_001429.3 | c.1186delT         | p.Ser396LeufsTer35 |
| <i>NF2</i>       | chr22:29999992 | NM_000268.3 | c.6_15del          | p.Gly3LeufsTer4    |
| <i>NFE2L2</i>    | chr2:178098956 | NM_006164.4 | c.89T>C            | p.Leu30Pro         |
| <i>TERT</i>      | chr5:1295250   | NM_198253.2 | c.1-146C>T         |                    |
| <i>TP53</i>      | chr17:7577534  | NM_000546.5 | c.747G>T           | p.Arg249Ser        |
| <i>PTEN</i> loss |                |             |                    |                    |

Table S2. Primers used in PCR and Sanger sequencing.

| Gene                 | Size of PCR Product (bp)*            | Primer Sequence                      |
|----------------------|--------------------------------------|--------------------------------------|
| <i>CTNNB1</i>        | 1187 (wild-type)<br>533 (exon 3 del) | FW: 5'-AGCGTGGACAATGGCTACTCAA-3'     |
|                      |                                      | REV: 5'-ACCTGGTCCTCGTCATTTAGCAGT-3'  |
| <i>EP300</i>         | 289                                  | FW: 5'-GGGCTGTTAGGAAGATGAAATAAGT-3'  |
|                      |                                      | REV: 5'-CAGCATTTTTTGAGGGGGGAGAC-3'   |
| <i>NF2</i>           | 304                                  | FW: 5'-CTGTGCAGCAACTCCAGGG-3'        |
|                      |                                      | REV: 5'-ACTGTCACCGCAGCAGTC-3'        |
| <i>NFE2L2</i>        | 458                                  | FW: 5'-CCCACCATCAACAGTGGCATA-3'      |
|                      |                                      | REV: 5'-GGCAAAGCTGGA ACTCAAATCCAG-3' |
| <i>TERT</i> promoter | 271                                  | FW: 5'-AGTGGATTCGCGGGGCACAGA-3'      |
|                      |                                      | REV: 5'-CAGCGCTGCCTGAAACTC-3'        |
| <i>TP53</i>          | 269                                  | FW: 5'-AGAAATCGGTAAGAGGTGGGC-3'      |
|                      |                                      | REV: 5'-GCTCTGACTGTACCACCATCC3'      |

\*Except for NFE2L2, size of PCR product includes addition of M13F and M13R sequence tags utilized to streamline Sanger sequencing procedures. M13F tag: 5'-TGTAACGACGGCCAGT-3' and M13R tag: 5'-CAGGAAACAGCTATGACC-3.'
